# Supplementary material for: Transcriptional profile of Salmonella enterica subsp. enterica serovar Weltevreden during alfalfa sprout colonization
Source: PubMed Central journal article supplement (PMC4265072; doi:10.1111/1751-7915.12104), 2013-12-06
Supplement: mbt20007-0528-sd1.pdf [file mbt20007-0528-sd1.pdf]

**Supplemental Data to:**

K. Brankatschk, Tim Kamber, Joël F. Pothier, Brion Duffy and Theo H.M. Smits

**Transcriptional Profile of *Salmonella enterica* subsp. *enterica* Serovar Weltevreden during Alfalfa Sprout Colonization**

**Table S1.** Genes higher transcribed in M9-glucose medium in comparison to sprouts determined by RNA-seq analysis.

| Category                | Gene                                      | Locus tag                 | Fold change     | Function                                                                                                                             |
|-------------------------|-------------------------------------------|---------------------------|-----------------|--------------------------------------------------------------------------------------------------------------------------------------|
| Amino acid metabolism   | <i>lysC</i>                               | SENTW_4304                | 26.36           | Aspartokinase III                                                                                                                    |
|                         | <i>asnA</i>                               | SENTW_3982                | 23.72           | Asparagine synthetase A                                                                                                              |
|                         | <i>skd</i>                                | SENTW_3964                | 12.09           | Shikimate 5-dehydrogenase                                                                                                            |
|                         | <i>araD</i>                               | SENTW_0054                | 9.87            | L-ribulose-5-phosphate 4-epimerase                                                                                                   |
|                         | <i>ilvC</i>                               | SENTW_4005                | 9.86            | Ketol-acid reductoisomerase                                                                                                          |
|                         | <i>tyrA</i>                               | SENTW_2788                | 8.94            | Chorismate mutase-T and prephenate dehydrogenase                                                                                     |
|                         | <i>aroF</i>                               | SENTW_2789                | 8.75            | Phospho-2-dehydro-3-deoxyheptonate aldolase                                                                                          |
|                         | <i>thrB</i>                               | SENTW_4706                | 6.22            | Homoserine kinase                                                                                                                    |
|                         | <i>ordL</i>                               | SENTW_3257                | 5.14            | Putative oxidoreductase                                                                                                              |
|                         | <i>pmrF, pqaB, yfbG, yfbH, yfbJ, yfbW</i> | SENTW_2421-2426           | 3.37            | Putative sugar transferase, formyltransferase, polysaccharide deacetylase, transferase, hypothetical protein, hypothetical protein   |
|                         | <i>trpA, trpB</i>                         | SENTW_1471-1472           | 3.31            | Tryptophan synthase                                                                                                                  |
|                         | <i>ilvI, ilvH</i>                         | SENTW_0072-0073           | 3.18            | Acetolactate synthase                                                                                                                |
|                         | <i>hisA, hisC, hisB, hisH, hisF, hisI</i> | SENTW_2197-2203           | 3.1             | Isomerise, aminotransferase, dehydratase, phosphate synthase subunit, isomerise, phosphate synthase subunit, pyrophosphatase protein |
|                         | Pathogenicity                             | <i>srfC, srfB1, srfB2</i> | SENTW_1611-1613 | 4.01                                                                                                                                 |
| <i>invE, invG, invF</i> |                                           | SENTW_2986-2988           | 4.35            | Invasion protein                                                                                                                     |
| <i>hofC, outE</i>       |                                           | SENTW_0101-0102           | 5.69            | Type IV pilin biogenesis protein, conserved protein with nucleoside triphosphate hydrolase domain                                    |
| <i>sipC</i>             |                                           | SENTW_2973                | 8.78            | Effector protein                                                                                                                     |
| Motility                | <i>yopP</i>                               | SENTW_2953                | 9.75            | Secreted effector protein                                                                                                            |
|                         | <i>fimA</i>                               | SENTW_0142                | 37.89           | Putative fimbrin-like protein                                                                                                        |
|                         | <i>fliK, fliJ</i>                         | SENTW_1108-1109           | 12.04           | Flagellar protein; Otagelin Flags                                                                                                    |
|                         | <i>fimH</i>                               | SENTW_4729                | 6.33            | Uncharacterized fimbrial-like protein                                                                                                |
|                         | <i>stbC, stbB</i>                         | SENTW_0321-0322           | 4.65            | Fimbrial chaperon protein, Outer membrane usher protein                                                                              |
|                         | <i>cheR, cheB</i>                         | SENTW_1164-1163           | 6.75            | Protein-glutamate methyltransferase; chemotaxis protein methyltransferase                                                            |
|                         | <i>cheA</i>                               | SENTW_1160                | 5.46            | Chemotaxis protein                                                                                                                   |
|                         | <i>ygiX, ygiY</i>                         | SENTW_3311-3312           | 5.18            | Transcriptional regulatory protein, sensor histidine kinase                                                                          |

|                                 |                          |                  |            |                                                                                                                 |                                       |
|---------------------------------|--------------------------|------------------|------------|-----------------------------------------------------------------------------------------------------------------|---------------------------------------|
| Cofactors and energy production | <i>tar</i>               | SENTW_1162       | 4.07       | Methyl-accepting chemotaxis protein II, aspartate sensor receptor                                               |                                       |
|                                 | <i>yfcS</i>              | SENTW_0164       | 15.72      | Pili chaperone protein                                                                                          |                                       |
|                                 | <i>yfiD</i>              | SENTW_1232       | 4.32       | Autonomous glycyl radical cofactor                                                                              |                                       |
|                                 | <i>ygbK, pdxA3, kdgT</i> | SENTW_0126-0128  | 6.61       | 2-keto-3-deoxygluconate permease, putative inner membrane protein, 4-hydroxythreonine-4-phosphate dehydrogenase |                                       |
| Regulators                      | <i>ynhD, ynhC, sufS</i>  | SENTW_1840-1842  | 3.85       | Cysteine desulfurase/selenocysteine lyase, desulfurase activator, desulfurase ATPase                            |                                       |
|                                 | <i>panE</i>              | SENTW_2762       | 6.36       | 2-dehydropantoate 2-reductase                                                                                   |                                       |
|                                 | <i>cbiB, cbiA</i>        | SENTW_2158-2159  | 5.51       | Cobyrinic acid A,C-diamide synthase                                                                             |                                       |
|                                 | SENTW_3738, <i>celR</i>  | SENTW_3738, 2840 | 30.52      | Regulatory protein                                                                                              |                                       |
|                                 | <i>prpR</i>              | SENTW_0349       | 13.6       | Propionate catabolism operon regulatory protein                                                                 |                                       |
|                                 | <i>sprB1</i>             | SENTW_2954       | 7.7        | Transcriptional regulator                                                                                       |                                       |
|                                 | <i>xapR1</i>             | SENTW_2598       | 6.99       | Transcriptional regulator                                                                                       |                                       |
|                                 | <i>treR</i>              | SENTW_4560       | 6.16       | Transcriptional Regulator                                                                                       |                                       |
|                                 | <i>hilD1</i>             | SENTW_2964       | 5.48       | Transcriptional regulator                                                                                       |                                       |
|                                 | <i>yhjB</i>              | SENTW_3706       | 5.34       | Transcriptional regulator                                                                                       |                                       |
|                                 | <i>fhlA</i>              | SENTW_2947       | 4.84       | Formate hydrogenlyase transcriptional activator                                                                 |                                       |
|                                 | <i>budR</i>              | SENTW_2764       | 4.66       | Transcriptional regulator                                                                                       |                                       |
|                                 | <i>ywbl</i>              | SENTW_4356       | 4.53       | Probable RuBisCO transcriptional regulator                                                                      |                                       |
|                                 | <i>alcR</i>              | SENTW_0345       | 4.45       | HTH-type transcriptional activator                                                                              |                                       |
|                                 | <i>hilD3</i>             | SENTW_2955       | 4.34       | Transcriptional regulator                                                                                       |                                       |
|                                 | Transporters             | <i>glnL</i>      | SENTW_4090 | 3.95                                                                                                            | Nitrogen regulation protein           |
|                                 |                          | <i>basR</i>      | SENTW_4379 | 3.82                                                                                                            | DNA-binding transcriptional regulator |
|                                 |                          | SENTW_4300       | 2.52       | DeoR family regulatory protein                                                                                  |                                       |
| <i>srlR,</i>                    |                          | SENTW_2924       | 2.38       | DNA-binding transcriptional repressor                                                                           |                                       |
| <i>gutM</i>                     |                          | SENTW_2923       | 6.05       | Glucitol operon activator protein                                                                               |                                       |
| <i>caiF</i>                     |                          | SENTW_0019       | 5.74       | Transcriptional activatory protein                                                                              |                                       |
| <i>citB, citA</i>               |                          | SENTW_4760-4761  | 5.21       | Response regulator, sensor kinase (Citrate fermentation)                                                        |                                       |
| <i>yegO3, mdtC, yegB,</i>       |                          | SENTW_2253-2257  | 4.24       | Multidrug efflux system subunit, signal transduction histidine-protein kinase,                                  |                                       |
| <i>baeS, baeR</i>               |                          |                  |            | DNA-binding transcriptional regulator                                                                           |                                       |
| <i>ail</i>                      |                          | SENTW_0330       | ∞          | Outer membrane protein                                                                                          |                                       |
| <i>gatA</i>                     |                          | SENTW_3389       | ∞          | PTS system                                                                                                      |                                       |
| <i>yjfI</i>                     |                          | SENTW_4477       | ∞          | inner membrane protein                                                                                          |                                       |
| <i>iroC</i>                     |                          | SENTW_2862       | 20.15      | Multidrug resistance protein                                                                                    |                                       |

|                  |                               |                 |       |                                                                         |
|------------------|-------------------------------|-----------------|-------|-------------------------------------------------------------------------|
|                  | <i>psaA, CYSA, sitC, sitD</i> | SENTW_2949-2952 | 13.47 | ABC transporter, Chelated iron transport                                |
|                  | <i>ompC</i>                   | SENTW_2395      | 12.11 | Putative outer membrane                                                 |
|                  | <i>pucJ</i>                   | SENTW_3736      | 9.35  | Putative xanthine permease                                              |
|                  | <i>cyaB, cyaD, srpC</i>       | SENTW_2856-2858 | 9.32  | Putative type I secretion protein                                       |
|                  | <i>nirC</i>                   | SENTW_4222      | 8.87  | Probable nitrite transporter                                            |
|                  | <i>yfgF</i>                   | SENTW_2686      | 8.75  | Innermembrane protein                                                   |
|                  | <i>sfbA</i>                   | SENTW_0496      | 7.82  | Lipoprotein                                                             |
|                  | <i>nmpC</i>                   | SENTW_1635      | 7.65  | Outer membrane pore protein                                             |
|                  | <i>yjfL</i>                   | SENTW_4477      | 7.26  | Inner membrane protein                                                  |
|                  | <i>ydiM</i>                   | SENTW_1851      | 7.19  | Inner membrane transport protein                                        |
|                  | <i>nhaC</i>                   | SENTW_1654      | 6.99  | Uncharacterized Na(+)/H(+) antiporter                                   |
|                  | <i>artJ</i>                   | SENTW_4458      | 6.45  | Arginine-binding periplasmic protein                                    |
|                  | <i>ptlG</i>                   | SENTW_4420      | 5.64  | Putative multidrug resistance protein                                   |
|                  | <i>sfbB, sfbC</i>             | SENTW_0497-0498 | 5.33  | Methionine import ATP-binding protein, lipoprotein                      |
|                  | <i>yebL</i>                   | SENTW_1193      | 5.26  | High-affinity zinc uptake system protein znuA                           |
|                  | <i>ydjN1</i>                  | SENTW_1845      | 5.12  | Putative L-cystine uptake protein                                       |
|                  | <i>ybbL, ybbM</i>             | SENTW_0488-0489 | 5.09  | Spermidine/putrescine import ATP-binding protein, innermembrane protein |
|                  | <i>yojI</i>                   | SENTW_2391      | 4.9   | Lipid A export ATP-binding/permease protein                             |
|                  | <i>modA, modB</i>             | SENTW_0755-0756 | 4.81  | Molybdate-binding periplasmic protein                                   |
|                  | <i>yceE</i>                   | SENTW_0365      | 4.53  | Multidrug resistance protein                                            |
|                  | <i>yahN</i>                   | SENTW_0347      | 4.31  | Putative threonine efflux protein                                       |
|                  | <i>yjgN</i>                   | SENTW_4583      | 4.21  | Inner membrane protein                                                  |
|                  | <i>exbB</i>                   | SENTW_3291      | 4.18  | Biopolymer transport protein                                            |
|                  | <i>tet</i>                    | SENTW_4826      | 4.13  | High-affinity glucose transporter                                       |
|                  | <i>kefB</i>                   | SENTW_4243      | 4.12  | Efflux system protein                                                   |
|                  | <i>tehA, theB</i>             | SENTW_1596-1597 | 3.89  | Tellurite resistance/ dicarboxylate transporter                         |
|                  | <i>znuB, znuC</i>             | SENTW_1191-1192 | 3.7   | Zinc import ATP-binding protein                                         |
|                  | <i>sgaT</i>                   | SENTW_4486      | 5.08  | PTS system                                                              |
|                  | <i>yejB, dppC</i>             | SENTW_2351-2352 | 3.2   | Permease                                                                |
|                  | <i>yadI</i>                   | SENTW_0143      | 4.3   | Putative PTS system IIA component                                       |
|                  | <i>fruA3</i>                  | SENTW_2336      | 7.93  | PTS system, fructose-specific IIBC component                            |
|                  | <i>kdgT</i>                   | SENTW_0632      | 5.26  | 2-keto-3-deoxygluconate permease 2                                      |
| Lipid metabolism | <i>dacD</i>                   | SENTW_2186      | 10.64 | DD-carboxypeptidase                                                     |
|                  | <i>pduP</i>                   | SENTW_2175      | 16.97 | Retinal dehydrogenase                                                   |

|                                |                                    |                 |        |                                                                                                                                                                                                                                          |
|--------------------------------|------------------------------------|-----------------|--------|------------------------------------------------------------------------------------------------------------------------------------------------------------------------------------------------------------------------------------------|
| Carbohydrate metabolism        | <i>ppiC</i>                        | SENTW_4006      | 11.08  | Peptidyl-prolyl cis-trans isomerase C                                                                                                                                                                                                    |
|                                | <i>fucA</i>                        | SENTW_3083      | ∞      | L-fuculose-1-phosphate aldolase                                                                                                                                                                                                          |
|                                | <i>fucK</i>                        | SENTW_3086      | 5.32   | L-fuculokinase                                                                                                                                                                                                                           |
|                                | <i>rhaD</i>                        | SENTW_4132      | 5.28   | Rhamnulose-1-phosphate aldolase                                                                                                                                                                                                          |
|                                | <i>citF, citX, citG</i>            | SENTW_0010-0012 | 4.78   | Citrate lyase alpha chain, holo-ACP synthase, triphosphoribosyl-dephospho-CoA synthase                                                                                                                                                   |
|                                | <i>yrbE</i>                        | SENTW_4537      | 33.45  | Oxidoreductase                                                                                                                                                                                                                           |
|                                | <i>pcm, surE, truD, ygbO, ygbP</i> | SENTW_3013-3017 | 2.26   | Protein-L-isoaspartate(D-aspartate) O-methyltransferase, stationary phase survival protein, tRNA pseudouridine13 synthase, 2-C-methyl-D-erythritol 2,4-cyclodiphosphate synthase, 2-C-methyl-D-erythritol 4-phosphate cytidyltransferase |
|                                | <i>galM, galK</i>                  | SENTW_0747-0748 | 2.92   | Galactokinase                                                                                                                                                                                                                            |
|                                | <i>gutQ</i>                        | SENTW_2925      | 3.48   | D-arabinose 5-phosphate isomerase                                                                                                                                                                                                        |
|                                | <i>gatZ</i>                        | SENTW_3388      | 3.99   | Putative tagatose 6-phosphate kinase 1                                                                                                                                                                                                   |
|                                | <i>adhE</i>                        | SENTW_1446      | 7.92   | Aldehyde-alcohol dehydrogenase                                                                                                                                                                                                           |
|                                | <i>fruK, fruB</i>                  | SENTW_2337-2338 | 7.4    | PTS system, fructose-specific IIA component, fructose-1-phosphate kinase                                                                                                                                                                 |
|                                | <i>yhcJ</i>                        | SENTW_1049      | ∞      | Putative N-acetylmannosamine-6-phosphate epimerase                                                                                                                                                                                       |
|                                | <i>yafB</i>                        | SENTW_0216      | 7.26   | 2,5-diketo-D-gluconate reductase B                                                                                                                                                                                                       |
| Nucleotide metabolism          | <i>purE, purK</i>                  | SENTW_0518-0519 | 3.77   | Carboxylase, hydrolase                                                                                                                                                                                                                   |
|                                | <i>allD</i>                        | SENTW_0513      | 13.87  | Ureidoglycolate dehydrogenase                                                                                                                                                                                                            |
| Genetic information processing |                                    |                 |        |                                                                                                                                                                                                                                          |
| – Replication and repair       | <i>ftsY1</i>                       | SENTW_3662      | 5.33   | Cell division protein                                                                                                                                                                                                                    |
|                                | <i>ykgM</i>                        | SENTW_0454      | 30.63  | 50S ribosomal protein                                                                                                                                                                                                                    |
| Phage genes                    | U 50                               | SENTW_0968      | ∞      | Probable tail fiber assembly protein                                                                                                                                                                                                     |
|                                | SENTW_2536                         | SENTW_2536      | ∞      | Bacteriophage                                                                                                                                                                                                                            |
|                                | SENTW_2553                         | SENTW_2552-2553 | ∞      | Salmonella phage                                                                                                                                                                                                                         |
|                                | V, W                               | SENTW_2822-2823 | ∞      | Phage                                                                                                                                                                                                                                    |
|                                | SENTW 2831, gpT1, gpT3             | SENTW_2831-2833 | 965.42 | Family phage tail tape measure protein                                                                                                                                                                                                   |
|                                | FI                                 | SENTW_2828      | 7.05   | Major tail sheath protein                                                                                                                                                                                                                |
|                                | <i>B, sid</i>                      | SENTW_4602-4603 | 6.66   | Capsid morphogenesis protein from phage; Late control gene B protein                                                                                                                                                                     |
|                                | SENTW 2808, P                      | SENTW_2808-2809 | 5.47   | 2                                                                                                                                                                                                                                        |
|                                | K, I                               | SENTW_1285-1286 | 4.71   | Tail assembly protein K, tail assembly protein                                                                                                                                                                                           |
|                                | J                                  | SENTW_1287      | 4.39   | Host specificity protein                                                                                                                                                                                                                 |

|                                                       |                                                                                   |                 |            |                                                                                                                                                                                                                                           |
|-------------------------------------------------------|-----------------------------------------------------------------------------------|-----------------|------------|-------------------------------------------------------------------------------------------------------------------------------------------------------------------------------------------------------------------------------------------|
|                                                       | <i>nohA</i> , 2, <i>vhtJ</i> , 4a, 4b, 5 6                                        | SENTW_1203-1208 | 3.01       | Gifsy-1 prophage DNA packaging protein, terminase, Gifsy-1 prophage head to tail joining protein, head-tail preconnector-like protein, head-tail preconnector protein GP5 [contains: scaffold protein GP6 (head protein GP6)]             |
| Anaerobic metabolism                                  | 5, 8                                                                              | SENTW_2531-2532 | 2.96       | Coat protein, scaffolding protein                                                                                                                                                                                                         |
|                                                       | <i>ccmC</i> , <i>ccmD</i> , <i>ccmE</i> , <i>ccmF</i> , <i>ccmG</i> , <i>ccmH</i> | SENTW_2375-2380 | ∞          | Heme exporter                                                                                                                                                                                                                             |
|                                                       | <i>hybF</i> , <i>hybE</i> , <i>hybD</i> , <i>hybC</i> , <i>hybB</i> , <i>hybA</i> | SENTW_3276-3281 | 3.99       | Hydrogenase nickel insertion, hydrogenase 2-specific chaperone, endopeptidase , hydrogenase subunits                                                                                                                                      |
|                                                       | <i>hypB</i> , <i>hypC</i> , <i>hypD</i> , <i>hypE</i>                             | SENTW_2943-2946 | 5.6        | Hydrogenase nickel incorporation protein, Hydrogenase isoenzymes formation protein, Hydrogenase isoenzymes formation protein, hydrogenase expression/formation protein                                                                    |
|                                                       | <i>fdhF1</i>                                                                      | SENTW_4371      | 5.33       | Formate dehydrogenase H                                                                                                                                                                                                                   |
| Iron metabolism                                       | <i>dmsC</i>                                                                       | SENTW_1716      | 4.77       | Anaerobic dimethyl sulfoxide reductase chain                                                                                                                                                                                              |
|                                                       | <i>dmsA</i>                                                                       | SENTW_4391      | 4.3        | Anaerobic dimethyl sulfoxide reductase subunit A                                                                                                                                                                                          |
|                                                       | <i>hydH</i>                                                                       | SENTW_4281      | 8.45       | Sensor kinase                                                                                                                                                                                                                             |
|                                                       | <i>hypA</i>                                                                       | SENTW_2942      | 5.99       | Hydrogenase nickel incorporation protein                                                                                                                                                                                                  |
|                                                       | <i>fes</i>                                                                        | SENTW_0562      | 66.91      | Enterochelin esterase                                                                                                                                                                                                                     |
|                                                       | <i>fepA</i>                                                                       | SENTW_2865      | 22.68      | Ferric enterobactin receptor                                                                                                                                                                                                              |
|                                                       | <i>feoA</i>                                                                       | SENTW_3601      | 6.99       | Ferrous iron transport protein A                                                                                                                                                                                                          |
|                                                       | <i>fixC</i> , <i>fixX</i>                                                         | SENTW_0029      | 27.7       | Putative oxidoreductase; Ferredoxin-like protein                                                                                                                                                                                          |
|                                                       | <i>iroB</i>                                                                       | SENTW_2861      | 13.07      | Putative glucosyltransferase                                                                                                                                                                                                              |
|                                                       | Nitrogen/sulfur metabolism                                                        | <i>glnK</i>     | SENTW_0448 | ∞                                                                                                                                                                                                                                         |
| <i>nirD</i> , <i>nirB</i>                             |                                                                                   | SENTW_4223-4224 | 4.13       | Nitrite reductase (NAD(P)H)                                                                                                                                                                                                               |
| <i>cysG</i>                                           |                                                                                   | SENTW_4221      | 8.06       | Siroheme synthase                                                                                                                                                                                                                         |
| <i>ttrC</i> , <i>ttrA</i>                             |                                                                                   | SENTW_1829-1830 | 6.55       | Tetrathionate reductase                                                                                                                                                                                                                   |
| <i>torD</i> , <i>yyaE</i> , <i>dmsB</i> , <i>ynfH</i> |                                                                                   | SENTW_0587-0590 | 2.56       | Putative component of anaerobic dehydrogenase, Periplasmic nitrate reductase (molybdopterin oxidoreductase), molybdopterin-containing oxidoreductase iron sulfur subunit, molybdopterin-containing oxidoreductase membrane anchor subunit |
| <i>dapB</i>                                           |                                                                                   | SENTW_0013      | 6.45       | Dihydrodipicolinate reductase                                                                                                                                                                                                             |
| SENTW_0381, <i>sbcC</i> , <i>sbcD</i>                 |                                                                                   | SENTW_0379-0381 | 48.08      | Exoclease subunit                                                                                                                                                                                                                         |
| Exoenzyme                                             | <i>ycfO</i>                                                                       | SENTW_2044      | 6.58       | Beta-N-acetylhexosaminidase                                                                                                                                                                                                               |
|                                                       | <i>exoO</i>                                                                       | SENTW_2568      | 5.11       | Endodeoxyribonuclease                                                                                                                                                                                                                     |
|                                                       | Unclassified                                                                      | <i>crcB</i>     | SENTW_0609 | 8.89                                                                                                                                                                                                                                      |
| SENTW_2009                                            |                                                                                   | SENTW_2009      | ∞          | putative oxidoreductase                                                                                                                                                                                                                   |

|                       |                                           |                 |         |                                                                         |
|-----------------------|-------------------------------------------|-----------------|---------|-------------------------------------------------------------------------|
|                       | SENTW_2697, <i>ratA1</i>                  | SENTW_2697-2698 | 3472.88 |                                                                         |
|                       | <i>ybhA</i> , SENTW_4094,<br><i>hemN3</i> | SENTW_4093-4095 | 3.44    | Hydrolase, hypothetical protein, coproporphyrinogen III oxidase         |
|                       | <i>yjbF</i> , <i>yjbG</i> , <i>yjbH</i>   | SENTW_4308-4310 | 3.82    | Uncharacterized lipoprotein, hypothetical protein, putative lipoprotein |
|                       | <i>degS</i>                               | SENTW_3478      | 8.72    | Serine protease                                                         |
|                       | <i>yqcB</i> , <i>yqcC</i>                 | SENTW_3074-3075 | 7.13    | Putative RNA pseudouridylate synthase, Hypothetical protein             |
|                       | <i>yghU</i>                               | SENTW_3272      | 6.12    | Putative glutathione S-transferase                                      |
|                       | <i>hsdR</i>                               | SENTW_4636      | 6.01    | Type I restriction-modification system                                  |
|                       | <i>ydfZ</i>                               | SENTW_1702      | 5.64    | Putative selenoprotein                                                  |
|                       | <i>yjdB</i>                               | SENTW_1576      | 2.53    | Putative metal dependent hydrolase                                      |
|                       | <i>yrfG</i>                               | SENTW_3592      | 4.94    | Putative hydrolase of the HAD superfamily                               |
|                       | <i>yaiV</i>                               | SENTW_0357      | 4.91    | Putative DNA-binding transcriptional regulator                          |
|                       | <i>ydiF</i>                               | SENTW_1856      | 4.53    | Coenzyme A transferase                                                  |
|                       | <i>yaiH</i>                               | SENTW_0358      | 4.5     | Penicillin-binding protein                                              |
|                       | <i>traI</i> , <i>traD</i>                 | SENTW_4777-4778 | 4.47    | Conjugal transfer protein, conjugal transfer nickase/helicase           |
|                       | <i>yggA</i>                               | SENTW_3182      | 4.37    | Arginine exporter protein                                               |
|                       | <i>phoN</i>                               | SENTW_4403      | 4.22    | Nonspecific acid phosphatase precursor                                  |
|                       | SENTW_5538, <i>insD</i>                   | SENTW_5538-5539 | 4.2     | Transposase                                                             |
| Hypothetical proteins | <i>ycgK</i>                               | SENTW_1202      | ∞       | Uncharacterized protein                                                 |
|                       | <i>ydjL</i>                               | SENTW_1927      | ∞       | hypothetical protein, only in <i>Choleraesius</i> str. SC-B67           |
|                       |                                           | SENTW_1197-1198 | 80.26   | Hypothetical protein, Hypothetical phage protein                        |
|                       |                                           | SENTW_1978      | 44.79   | Hypothetical protein                                                    |
|                       | <i>yodA</i>                               | SENTW_1965      | 20.52   | Hypothetical protein                                                    |
|                       |                                           | SENTW_1608      | 20.15   | Hypothetical protein                                                    |
|                       | <i>ygaW</i>                               | SENTW_2890      | 20.15   | Hypothetical protein                                                    |
|                       | SENTW_1610, <i>ydcX</i>                   | SENTW_1609      | 20.03   | Hypothetical protein                                                    |
|                       | <i>Mmab</i>                               | SENTW_2174      | 16.97   | Hypothetical protein                                                    |
|                       |                                           | SENTW_4395      | 15.97   | Hypothetical protein                                                    |
|                       | <i>yrfB</i> , <i>yrfC</i> , <i>yrfD</i>   | SENTW_3584-3586 | 15.84   | Hypothetical protein                                                    |
|                       | <i>yhhT</i>                               | SENTW_3675      | 14.11   | Hypothetical protein                                                    |
|                       |                                           | SENTW_0014      | 13.3    | Hypothetical protein                                                    |
|                       |                                           | SENTW_5520      | 12.61   | Hypothetical protein                                                    |
|                       | <i>ybeD</i>                               | SENTW_0616      | 12.19   | Hypothetical protein                                                    |
|                       |                                           | SENTW_1247      | 11.29   | Hypothetical protein                                                    |

---

|                         |                 |       |                                                              |
|-------------------------|-----------------|-------|--------------------------------------------------------------|
|                         | SENTW_4598-4600 | 10.99 | Hypothetical protein                                         |
|                         | SENTW_4419      | 10.28 | Hypothetical protein                                         |
|                         | SENTW_4620      | 10.08 | Hypothetical protein                                         |
|                         | SENTW_3740      | 9.87  | Hypothetical protein                                         |
| <i>yaeQ, yaeJ</i>       | SENTW_0206-0207 | 9.53  | Hypothetical protein, peptidyl-tRNA hydrolase domain protein |
| <i>yddG</i>             | SENTW_1637      | 9.51  | Hypothetical protein                                         |
| <i>creD</i>             | SENTW_4695      | 9.33  | Hypothetical protein                                         |
| <i>yhjU, yhjT, yhjS</i> | SENTW_3725-3726 | 9.23  | Hypothetical protein                                         |
|                         | SENTW_3729      |       |                                                              |
| <i>yjiJ</i>             | SENTW_4626      | 8.64  | Hypothetical protein                                         |
|                         | SENTW_1531      | 8.6   | Hypothetical protein                                         |
| <i>yfeN</i>             | SENTW_2602      | 8.5   | Hypothetical protein                                         |
|                         | SENTW_3286      | 8.06  | Hypothetical protein                                         |
| <i>yfcC</i>             | SENTW_4571      | 8.06  | Hypothetical protein                                         |
|                         | SENTW_2995      | 7.72  | Hypothetical protein                                         |
| <i>yaaI</i>             | SENTW_4714      | 7.52  | Hypothetical protein                                         |
|                         | SENTW_1331      | 7.26  | Hypothetical protein                                         |
|                         | SENTW_3025      | 7.32  | Hypothetical protein                                         |
|                         | SENTW_4303      | 7.05  | Hypothetical protein                                         |
| <i>ybhM</i>             | SENTW_0788      | 6.99  | Hypothetical protein                                         |
| SENTW_2784, <i>yfiO</i> | SENTW_2783-2784 | 6.68  | Hypothetical protein; putative outer membrane protein        |
|                         | SENTW_1058      | 6.31  | Hypothetical protein                                         |
|                         | SENTW_2125      | 6.13  | Hypothetical protein                                         |
| <i>yjcC</i>             | SENTW_4348      | 6.09  | Hypothetical protein                                         |
|                         | SENTW_1634      | 6.05  | Hypothetical protein                                         |
|                         | SENTW_4302      | 6.05  | Hypothetical protein                                         |
| <i>ydiZ</i>             | SENTW_1887      | 5.91  | Hypothetical protein                                         |
|                         | SENTW_4617      | 5.84  | Hypothetical protein                                         |
|                         | SENTW_0093      | 5.78  | Hypothetical protein                                         |
|                         | SENTW_1142      | 5.69  | Hypothetical protein                                         |
| <i>ypeC</i>             | SENTW_2590      | 5.64  | Hypothetical protein                                         |
| <i>yjbQ</i>             | SENTW_4335      | 5.49  | Hypothetical protein                                         |
|                         | SENTW_0631      | 5.44  | Hypothetical protein                                         |
| <i>ynjA</i>             | SENTW_2894      | 5.44  | Hypothetical protein                                         |

---



---

|                               |                 |      |                                                                   |
|-------------------------------|-----------------|------|-------------------------------------------------------------------|
|                               | SENTW_5514      | 5.33 | Hypothetical protein                                              |
| <i>iroE</i>                   | SENTW_2864      | 5.28 | Hypothetical protein                                              |
|                               | SENTW_1529      | 5.14 | Hypothetical protein                                              |
| <i>yqfB</i>                   | SENTW_3164      | 4.97 | Hypothetical protein                                              |
|                               | SENTW_4346      | 4.89 | Hypothetical protein                                              |
|                               | SENTW_4739      | 4.88 | Hypothetical protein                                              |
| <i>dedD,folC</i>              | SENTW_2490-2491 | 4.85 | Hypothetical protein, dihydrofolate:folylpolyglutamate synthetase |
|                               | SENTW_1884      | 4.84 | Hypothetical protein                                              |
| <i>ygaC</i>                   | SENTW_2891      | 4.71 | Hypothetical protein                                              |
|                               | SENTW_3623      | 4.69 | Hypothetical protein                                              |
|                               | SENTW_3868      | 4.64 | Hypothetical protein                                              |
| <i>yczH</i>                   | SENTW_0306      | 4.57 | Hypothetical protein                                              |
| <i>yeaJ</i>                   | SENTW_1942      | 4.55 | Hypothetical protein                                              |
| <i>trpH</i>                   | SENTW_1476      | 4.55 | Hypothetical protein                                              |
| <i>iicA</i>                   | SENTW_4625      | 4.47 | Hypothetical protein                                              |
| <i>ppdC, ygdB, ppdB, ppdA</i> | SENTW_3106-3109 | 4.44 | Hypothetical proteins                                             |
|                               | SENTW_0483      | 4.43 | Hypothetical protein                                              |
|                               | SENTW_1250      | 4.43 | Hypothetical protein                                              |
| <i>ymfB</i>                   | SENTW_1709      | 4.35 | Hypothetical protein                                              |
|                               | SENTW_0033      | 4.34 | Hypothetical protein                                              |
|                               | SENTW_2500      | 4.32 | Hypothetical protein                                              |
|                               | SENTW_3902      | 4.27 | Hypothetical protein                                              |
|                               | SENTW_2720      | 4.22 | Hypothetical protein                                              |
| <i>yfeD</i>                   | SENTW_2595      | 4.19 | Hypothetical protein                                              |
|                               | SENTW_4301      | 3.79 | Hypothetical protein                                              |
| <i>yqaA, yqaB</i>             | SENTW_2911-2912 | 2.78 | Hypothetical protein, fructose-1-phosphatase                      |
| CP83,SENTW 2802, <i>exoX</i>  | SENTW_2800-2802 | 5.4  | Putative exonuclease, Hypothetical protein, Hypothetical protein  |

---
